# Supplementary material for: Effectiveness of decision aids for female BRCA1 and BRCA2 mutation carriers: a systematic review
Source: BMC Med Inform Decis Mak. 2019 Aug 1;19:154. doi: 10.1186/s12911-019-0872-2 (PMC6670224; doi:10.1186/s12911-019-0872-2)
Supplement: Supplementary file 2 — Quality of randomized controlled trials / Rationale. (XLSX 15 kb) [file 12911_2019_872_MOESM2_ESM.xlsx]

## Sheet: Tabelle1
ARMSTRONG 2005 [22]
Bias	Author's judgement	Support for judgement
Random sequence generation (selection bias)	+	Page 9322, Random assignment and Blinding: "Random assignment was conducted using sequential sealed envelopes containing randomly generated group assignments.
Allocation concealment (selection bias)	+	Page 9322, Random assignment and Blinding: "Random assignment was conducted using sequential sealed envelopes containing randomly generated group assignments. These envelopes were kept by the study statistician. At the time a patient agreed to participate, the statistician was contacted, the next envelope was opened, and the randomization code was assigned"
Blinding of participants and personnel (performance bias)	(-)2	Page 9322, Random assignment and Blinding: "Because of the nature of the intervention, the research coordinator who generated and administered the DSS for each participant was not blinded to group assignment. However, the participants, other study investigators, and the interviewer who conducted the outcome assessment were blinded."
Blinding of outcome assessment (detection bias)	+	Page 9322, Random assignment and Blinding: "Because of the nature of the intervention, the research coordinator who generated and administered the DSS for each participant was not blinded to group assignment. However, the participants, other study investigators, and the interviewer who conducted the outcome assessment were blinded."
Incomplete outcome data (attrition bias)	?	Page 9323, Results: "Thirty-two women were enrolled onto the trial, and 27 women completed follow-up (13 women in the DSS arm and 14 women in the control arm)." The overall drop out rate is low, but the numbers are not provided for each outcome. The reasons for the drop out are mentioned and are not related to the outcome.
Selective reporting (reporting bias)	+	All pre-specified outcomes are reported in the results section (Page 9323) in the pre-specified way.
Other bias	+	No evidence for other sources of bias.
RISK OF BIAS	Unclear
2 Patients and outcome assessors blinded, staff not blinded
DSS: Decision support system
SCHWARTZ 2009 [23]
Bias	Author's judgement	Support for judgement
Random sequence generation (selection bias)	+	Page 4, Procedure: "At the conclusion of this interview, eligible participants provided verbal consent and were randomized via computer-generated random number in a 1:1 ratio to either the Usual Care (UC; N=114) or Usual Care plus Decision Aid (DA; N=100) arm."
Allocation concealment (selection bias)	?	Not mentioned.
Blinding of participants and personnel (performance bias)	(-)3	Page 4, Procedure: "Participants in the UC arm received no further intervention. Participants in the DA arm were mailed the CD-ROM via priority mail. We recontacted participants at 1-, 6-, and 12-months post-randomization for follow-up telephone interviews." Blinding of personnel not mentioned.
Blinding of outcome assessment (detection bias)	(-)1	Patient-Reported Outcome Measures (PROMs) with unblinded patients.
Incomplete outcome data (attrition bias)	?	The drop out numbers are not provided for each individual outcome. The graphs are unclear.
Selective reporting (reporting bias)	+	All pre-specified outcomes are reported in the results section (Page 6) in the pre-specified way.
Other bias	+	No evidence for other sources of bias.
RISK OF BIAS	High
1 Patient-Reported Outcome Measures (PROMs) with unblinded patients
3 patients not blinded, blinding of staff not or not completely mentioned
DA: Decision aid; UC: Usual care; CD-ROM: Compact Disc Read-Only Memory
HOOKER 2011 [24]
Bias	Author's judgement	Support for judgement
Random sequence generation (selection bias)	+	Page 4, Procedure: After completing this interview, eligible participants provided verbal consent for participation in the randomized control trial and were randomized by the research assistant in a 1:1 ratio to either the UC (N=114) or usual care plus DA (DA; N=100) arm. Randomization sequences were generated for each research site in blocks of four using the SAS software package, and research a…
Allocation concealment (selection bias)	?	Not mentioned.
Blinding of participants and personnel (performance bias)	(-)3	Page 4, Procedure: "Randomization sequences were generated for each research site in blocks of four using the SAS software package, and research assistants were kept blind to the randomization sequences until the interventions were assigned." / "Participants assigned to the UC arm received no further intervention while participants in the DA arm were mailed the CD-ROM-based interactive DA via pri…
Blinding of outcome assessment (detection bias)	(-)1	Patient-Reported Outcome Measures (PROMs) with unblinded patients.
Incomplete outcome data (attrition bias)	?	The drop out numbers are not provided for each individual outcome.
Selective reporting (reporting bias)	+	Pre-specified outcome "management decision" is missing in the results section (Pages 6, 7). Explanation is mentionded in the Discussion, page 8: "There were a relatively small number of women who obtained risk-reducing mastectomy during the study. Thus, we were underpowered to examine actual decision making outcomes."
Other bias	+	No evidence for other sources of bias.
RISK OF BIAS	High
1 Patient-Reported Outcome Measures (PROMs) with unblinded patients
3 patients not blinded, blinding of staff not or not completely mentioned
DA: Decision aid; UC: Usual care; CD-ROM: Compact Disc Read-Only Memory
METCALFE 2017 [25]
Bias	Author's judgement	Support for judgement
Random sequence generation (selection bias)	+	Page 2, Design and procedure: "If all eligibility criteria were met, then the women were randomized centrally with a secure Web-based randomization service (http://www.randomize.net)."
Allocation concealment (selection bias)	?	Not mentioned.
Blinding of participants and personnel (performance bias)	-	Page 2, Design and procedure: "A follow-up telephone call with the study coordinator took place 4 weeks after randomization to ensure that the DA had been received." Patient blinding stopped when they were called and asked about the DA. The staff can not be blinded when they ask about the DA.
Blinding of outcome assessment (detection bias)	(-)1,4	Page 2, Design and Procedure: "A research assistant blinded to group allocation telephoned all study participants at 3, 6, and 12 months postrandomization to determine trial outcomes." It is likely that the blinding of the staff has been broken during the telephone interview, since the patients knew wether they received the DA or not and might have mentioned this during the phone call. Patient-Re…
Incomplete outcome data (attrition bias)	?	The drop out numbers are not provided for each individual outcome.
Selective reporting (reporting bias)	+	All pre-specified outcomes are reported in the results section (Pages 3, 4, 5) in the pre-specified way.
Other bias	+	No evidence for other sources of bias.
RISK OF BIAS	High
1 Patient-Reported Outcome Measures (PROMs) with unblinded patients
4 Research assistant blinded but likely that blinding has been broken
DA: Decision aid
