# Supplementary material for: Effectiveness of decision aids for female BRCA1 and BRCA2 mutation carriers: a systematic review
Source: BMC Med Inform Decis Mak. 2019 Aug 1;19:154. doi: 10.1186/s12911-019-0872-2 (PMC6670224; doi:10.1186/s12911-019-0872-2)
Supplement: Supplementary file 3 — Quality of pretest-posttest study / Rationale. (XLSX 14 kb) [file 12911_2019_872_MOESM3_ESM.xlsx]

## Sheet: Tabelle1
METCALFE 2007 [27]
Bias	Author's judgement	Support for judgement
Bias due to confounding	Serious	The inclusion criteria are mentioned, but important baseline characteristics of the participants such as age or family planning are not reported.
Bias in selection of participants into the study	Low	No evidence for changes in selection of participants after the start of the intervention. Start of follow up and start of intervention coincide for most patients. Page 212: "A pre-test–post-test design was used with measures at two points in time (prior to using the decision aid, and within 4 weeks after using the decision aid)."
Bias in classification/measurement of interventions	Low	Intervention groups were clearly defined. All women received the same intervention. Page 212: "The sample included 21 women. Eligible participants for the pre-test–post-test evaluation included female BRCA1 or BRCA2 mutation carriers who (i) received genetic testing within the last year, (ii) knew their mutation status, (iii) had given previous consent to be recontacted for future research studie…
Bias due to deviations from intended interventions	Low	There is no evidence for deviations from the intended intervention beyond what is expected in usual practice.
Bias due to missing data	No information	The drop out rate is low (< 5%). There is no clear information if data for each outcome were available for nearly all participants. It is not clear, whether an intention-to-treat or a per-protocol analysis was used, therefore there is no clear evidence for robustness.
Bias in measurement of outcomes	Serious	The outcome measure is likely to be influenced by the knowledge of the intervention (response bias). Page 212: "During the counseling session with the genetic counselor, the subjects were encouraged to share their thoughts on the decision aid, ask questions about breast cancer prevention options, and discuss any concerns with the genetic counselor."
Bias in selection of the reported result	Low	All initially specified outcomes were reported adequately. There was no analysis of subgroups. There was no multiple analysis.
OVERALL	SERIOUS
BRCA1: breast cancer gene 1; BRCA2: breast cancer gene 2
